# Supplementary material
Source: publisher site journal article supplement (https://www.dovepress.com/article/281288)
Supplement: Supplementary file 1 [file get_supplementary_file.php]

**Supplementary Table S1.** Clinical characteristics and identifications of all *Aspergillus* spp. isolates analyzed in our study

| Species               | Strain     | Time    | Origin | Age | Gender | Underlying disease      | Diagnosis    | GenBank accession number |          |          | Morphological identification | Molecular identification |
|-----------------------|------------|---------|--------|-----|--------|-------------------------|--------------|--------------------------|----------|----------|------------------------------|--------------------------|
|                       |            |         |        |     |        |                         |              | ITS                      | BenA     | CaM      |                              |                          |
| <i>A. fumigatus</i> C | CMXY 1555  | 2016.03 | BALF   | 65  | M      | -                       | Colonization | MG991570                 | MG991328 | MG991436 | <i>A. fumigatus</i>          | <i>A. fumigatus</i>      |
| N=57                  | CMXY 1704  | 2016.03 | BALF   | 75  | M      | -                       | CPA          | MG991571                 | MG991334 | MG991442 | <i>A. fumigatus</i>          | <i>A. fumigatus</i>      |
|                       | CMXY 1856  | 2016.03 | BALF   | 50  | M      | -                       | IPA          | MG991573                 | MG991338 | MG991446 | <i>A. fumigatus</i>          | <i>A. fumigatus</i>      |
|                       | CMXY 2075  | 2016.04 | BALF   | 38  | M      | -                       | Colonization | MG991577                 | MG991348 | MG991456 | <i>A. fumigatus</i>          | <i>A. fumigatus</i>      |
|                       | CMXY 2236  | 2016.05 | BALF   | 68  | M      | -                       | Colonization | MG991579                 | MG991358 | MG991466 | <i>A. fumigatus</i>          | <i>A. fumigatus</i>      |
|                       | CMXY 2245  | 2016.05 | BALF   | 49  | M      | -                       | CPA          | MG991580                 | MG991359 | MG991467 | <i>A. fumigatus</i>          | <i>A. fumigatus</i>      |
|                       | CMXY 2576  | 2016.05 | BALF   | 58  | M      | -                       | IPA          | MG991582                 | MG991375 | MG991483 | <i>A. fumigatus</i>          | <i>A. fumigatus</i>      |
|                       | CMXY 5207  | 2016.06 | BALF   | 53  | M      | Liver disease           | Colonization | MG991585                 | MG991403 | MG991511 | <i>A. fumigatus</i>          | <i>A. fumigatus</i>      |
|                       | CMXY 5317  | 2016.06 | BALF   | 69  | M      | -                       | Colonization | MG991586                 | MG991404 | MG991512 | <i>A. fumigatus</i>          | <i>A. fumigatus</i>      |
|                       | CMXY 5447  | 2016.07 | BALF   | 35  | M      | -                       | Colonization | MG991587                 | MG991405 | MG991513 | <i>A. fumigatus</i>          | <i>A. fumigatus</i>      |
|                       | CMXY 5995  | 2016.07 | BALF   | 66  | M      | -                       | Colonization | MG991590                 | MG991408 | MG991516 | <i>A. fumigatus</i>          | <i>A. fumigatus</i>      |
|                       | CMXY 6729  | 2016.08 | BALF   | 90  | M      | COPD                    | Colonization | MG991592                 | MG991410 | MG991518 | <i>A. fumigatus</i>          | <i>A. fumigatus</i>      |
|                       | CMXY 6866  | 2016.08 | BALF   | 35  | M      | -                       | Colonization | MG991594                 | MG991412 | MG991520 | <i>A. fumigatus</i>          | <i>A. fumigatus</i>      |
|                       | CMXY 7591  | 2016.09 | BALF   | 79  | F      | DM                      | CPA          | MG991595                 | MG991413 | MG991521 | Genus <i>Aspergillus</i>     | <i>A. fumigatus</i>      |
|                       | CMXY 9054  | 2016.10 | BALF   | 73  | F      | -                       | CPA          | MG991598                 | MG991416 | MG991524 | Genus <i>Aspergillus</i>     | <i>A. fumigatus</i>      |
|                       | CMXY 9646  | 2016.12 | BALF   | 68  | M      | DM                      | Colonization | MG991599                 | MG991417 | MG991526 | <i>A. fumigatus</i>          | <i>A. fumigatus</i>      |
|                       | CMXY 9825  | 2016.12 | BALF   | 73  | F      | -                       | CPA          | MG991600                 | MG991419 | MG991527 | <i>A. fumigatus</i>          | <i>A. fumigatus</i>      |
|                       | CMXY 9967  | 2017.02 | BALF   | 48  | M      | Hematologic cancer, CKD | Colonization | MG991601                 | MG991420 | MG991528 | <i>A. fumigatus</i>          | <i>A. fumigatus</i>      |
|                       | CMXY 10234 | 2017.02 | BALF   | 78  | F      | Cerebral infarction     | Colonization | MG991602                 | MG991313 | MG991421 | <i>A. fumigatus</i>          | <i>A. fumigatus</i>      |
|                       | CMXY 10245 | 2017.03 | BALF   | 69  | M      | CKD, Diabetes           | Colonization | MG991603                 | MG991314 | MG991422 | <i>A. fumigatus</i>          | <i>A. fumigatus</i>      |
|                       | CMXY 10850 | 2017.04 | BALF   | 66  | F      | -                       | Colonization | MG991604                 | MG991315 | MG991423 | Genus <i>Aspergillus</i>     | <i>A. fumigatus</i>      |
|                       | CMXY 12193 | 2017.04 | BALF   | 35  | M      | -                       | Colonization | MG991607                 | MG991318 | MG991426 | Genus <i>Aspergillus</i>     | <i>A. fumigatus</i>      |
|                       | CMXY 12402 | 2017.07 | BALF   | 35  | M      | -                       | Colonization | MG991608                 | MG991319 | MG991427 | Genus <i>Aspergillus</i>     | <i>A. fumigatus</i>      |

|            |         |      |    |   |                            |              |          |          |          |                          |                     |
|------------|---------|------|----|---|----------------------------|--------------|----------|----------|----------|--------------------------|---------------------|
| CMXY 12654 | 2017.08 | BALF | 20 | M | SLE                        | Colonization | MG991609 | MG991320 | MG991428 | <i>A. fumigatus</i>      | <i>A. fumigatus</i> |
| CMXY 13113 | 2017.11 | BALF | 65 | M | -                          | CPA          | MG991610 | MG991321 | MG991429 | <i>A. fumigatus</i>      | <i>A. fumigatus</i> |
| CMXY 13433 | 2017.12 | BALF | 71 | M | -                          | Colonization | MG991611 | MG991322 | MG991430 | <i>A. fumigatus</i>      | <i>A. fumigatus</i> |
| CMXY 13495 | 2017.12 | BALF | 49 | M | MODS                       | Colonization | MG991612 | MG991323 | MG991431 | <i>A. fumigatus</i>      | <i>A. fumigatus</i> |
| CMXY 13993 | 2017.01 | BALF | 83 | F | DM, Chronic heart failure  | Colonization | MG991613 | MG991324 | MG991432 | <i>A. fumigatus</i>      | <i>A. fumigatus</i> |
| CMXY 14287 | 2017.03 | BALF | 62 | F | -                          | Colonization | MG991614 | MG991325 | MG991433 | <i>A. fumigatus</i>      | <i>A. fumigatus</i> |
| CMXY 14383 | 2017.08 | BALF | 58 | M | -                          | Colonization | MG991615 | MG991326 | MG991434 | <i>A. fumigatus</i>      | <i>A. fumigatus</i> |
| CMXY 15698 | 2017.05 | BALF | 64 | M | -                          | Colonization | MG991617 | MG991329 | MG991437 | <i>A. fumigatus</i>      | <i>A. fumigatus</i> |
| CMXY 15837 | 2017.05 | BALF | 48 | M | Liver disease              | CPA          | MG991618 | MG991330 | MG991438 | <i>A. fumigatus</i>      | <i>A. fumigatus</i> |
| CMXY 16512 | 2017.06 | BALF | 44 | M | Hematologic cancer         | Colonization | MG991620 | MG991332 | MG991440 | <i>A. fumigatus</i>      | <i>A. fumigatus</i> |
| CMXY 16517 | 2017.12 | BALF | 77 | F | -                          | Colonization | MG991621 | MG991333 | MG991441 | <i>A. fumigatus</i>      | <i>A. fumigatus</i> |
| CMXY 18243 | 2017.11 | BALF | 61 | M | Hematologic cancer         | Colonization | MG991623 | MG991337 | MG991445 | <i>A. fumigatus</i>      | <i>A. fumigatus</i> |
| CMXY 19504 | 2017.02 | BALF | 51 | M | Liver disease              | Colonization | MG991626 | MG991341 | MG991449 | <i>A. fumigatus</i>      | <i>A. fumigatus</i> |
| CMXY 21351 | 2017.02 | BALF | 69 | F | -                          | Colonization | MG991631 | MG991350 | MG991458 | <i>A. fumigatus</i>      | <i>A. fumigatus</i> |
| CMXY 21425 | 2017.04 | BALF | 43 | M | DM                         | Colonization | MG991634 | MG991353 | MG991461 | <i>A. fumigatus</i>      | <i>A. fumigatus</i> |
| CMXY 21658 | 2017.03 | BALF | 69 | F | -                          | Colonization | MG991635 | MG991354 | MG991462 | Genus <i>Aspergillus</i> | <i>A. fumigatus</i> |
| CMXY 22687 | 2017.05 | BALF | 52 | F | COPD                       | Colonization | MG991639 | MG991361 | MG991469 | Genus <i>Aspergillus</i> | <i>A. fumigatus</i> |
| CMXY 22843 | 2017.05 | BALF | 86 | M | Chronic heart failure, CKD | Colonization | MG991640 | MG991362 | MG991470 | Genus <i>Aspergillus</i> | <i>A. fumigatus</i> |
| CMXY 22850 | 2017.02 | BALF | 83 | M | -                          | Colonization | MG991641 | MG991363 | MG991471 | <i>A. fumigatus</i>      | <i>A. fumigatus</i> |
| CMXY 23257 | 2017.08 | BALF | 88 | M | -                          | Colonization | MG991644 | MG991366 | MG991474 | <i>A. fumigatus</i>      | <i>A. fumigatus</i> |
| CMXY 23299 | 2018.02 | BALF | 83 | M | Chronic heart failure      | Colonization | MG991645 | MG991367 | MG991475 | Genus <i>Aspergillus</i> | <i>A. fumigatus</i> |
| CMXY 25241 | 2018.01 | BALF | 65 | M | DM                         | Colonization | MG991650 | MG991373 | MG991481 | <i>A. fumigatus</i>      | <i>A. fumigatus</i> |
| CMXY 27062 | 2018.03 | BALF | 92 | M | Solid tumor, DM, COPD      | Colonization | MG991656 | MG991380 | MG991488 | Genus <i>Aspergillus</i> | <i>A. fumigatus</i> |
| CMXY 27755 | 2017.12 | BALF | 63 | M | Solid tumor, PT, DM        | IPA          | MG991660 | MG991384 | MG991492 | Genus <i>Aspergillus</i> | <i>A. fumigatus</i> |
| CMXY 28940 | 2017.12 | BALF | 48 | M | PT, Solid tumor            | CPA          | MG991663 | MG991387 | MG991495 | Genus <i>Aspergillus</i> | <i>A. fumigatus</i> |
| CMXY 29459 | 2017.11 | BALF | 75 | M | Solid tumor                | CPA          | MG991665 | MG991389 | MG991497 | <i>A. fumigatus</i>      | <i>A. fumigatus</i> |

|                    |            |         |      |    |   |                      |              |          |          |          |                          |                     |
|--------------------|------------|---------|------|----|---|----------------------|--------------|----------|----------|----------|--------------------------|---------------------|
|                    | CMXY 29987 | 2017.10 | BALF | 65 | M | Solid tumor          | CPA          | MG991667 | MG991391 | MG991499 | <i>A. fumigatus</i>      | <i>A. fumigatus</i> |
|                    | CMXY 29991 | 2017.09 | BALF | 78 | M | Solid tumor          | CPA          | MG991668 | MG991392 | MG991500 | <i>A. fumigatus</i>      | <i>A. fumigatus</i> |
|                    | CMXY 30056 | 2018.02 | BALF | 76 | M | Epidural hematoma    | Colonization | MG991669 | MG991393 | MG991501 | <i>A. fumigatus</i>      | <i>A. fumigatus</i> |
|                    | CMXY 30169 | 2018.03 | BALF | 58 | M | Paraplegia, MODS     | Colonization | MG991670 | MG991394 | MG991502 | <i>A. fumigatus</i>      | <i>A. fumigatus</i> |
|                    | CMXY 30534 | 2018.02 | BALF | 66 | F | -                    | Colonization | MG991672 | MG991396 | MG991504 | Genus <i>Aspergillus</i> | <i>A. fumigatus</i> |
|                    | CMXY 30812 | 2018.01 | BALF | 52 | M | -                    | Colonization | MG991674 | MG991398 | MG991506 | Genus <i>Aspergillus</i> | <i>A. fumigatus</i> |
|                    | CMXY 30905 | 2017.12 | BALF | 53 | M | -                    | Colonization | MG991675 | MG991399 | MG991507 | <i>A. fumigatus</i>      | <i>A. fumigatus</i> |
|                    | CMXY 31319 | 2017.11 | BALF | 50 | F | PT                   | CPA          | MG991676 | MG991400 | MG991508 | Genus <i>Aspergillus</i> | <i>A. fumigatus</i> |
| <i>A. flavus</i> C | CMXY 1982  | 2016.03 | BALF | 66 | M | -                    | Colonization | MG991575 | MG991344 | MG991452 | <i>A. flavus</i>         | <i>A. flavus</i>    |
| N=23               | CMXY 5740  | 2016.03 | BALF | 50 | M | -                    | Colonization | MG991589 | MG991407 | MG991515 | <i>A. flavus</i>         | <i>A. flavus</i>    |
|                    | CMXY 8113  | 2016.03 | BALF | 63 | M | -                    | Colonization | MG991597 | MG991415 | MG991523 | Genus <i>Aspergillus</i> | <i>A. flavus</i>    |
|                    | CMXY 12030 | 2016.03 | BALF | 59 | M | -                    | Colonization | MG991606 | MG991317 | MG991425 | Genus <i>Aspergillus</i> | <i>A. tamaritii</i> |
|                    | CMXY 14895 | 2017.01 | BALF | 94 | M | -                    | Colonization | MG991616 | MG991327 | MG991435 | Genus <i>Aspergillus</i> | <i>A. flavus</i>    |
|                    | CMXY 18241 | 2017.02 | BALF | 55 | M | -                    | Colonization | MG991622 | MG991336 | MG991444 | <i>A. flavus</i>         | <i>A. flavus</i>    |
|                    | CMXY 21394 | 2017.04 | BALF | 66 | F | -                    | Colonization | MG991632 | MG991351 | MG991459 | <i>A. flavus</i>         | <i>A. flavus</i>    |
|                    | CMXY 21395 | 2017.03 | BALF | 68 | F | CKD, DM              | Colonization | MG991633 | MG991352 | MG991460 | <i>A. flavus</i>         | <i>A. flavus</i>    |
|                    | CMXY 21725 | 2017.06 | BALF | 64 | M | DM                   | ABPA         | MG991636 | MG991355 | MG991463 | Genus <i>Aspergillus</i> | <i>A. flavus</i>    |
|                    | CMXY 22227 | 2017.05 | BALF | 88 | M | Cerebral infarction  | Colonization | MG991637 | MG991357 | MG991465 | <i>A. flavus</i>         | <i>A. effusus</i>   |
|                    | CMXY 22565 | 2017.07 | BALF | 46 | M | -                    | Colonization | MG991638 | MG991360 | MG991468 | Genus <i>Aspergillus</i> | <i>A. effusus</i>   |
|                    | CMXY 22865 | 2017.06 | BALF | 30 | M | Liver disease        | Colonization | MG991642 | MG991364 | MG991472 | Genus <i>Aspergillus</i> | <i>A. flavus</i>    |
|                    | CMXY 22879 | 2017.06 | BALF | 18 | F | -                    | Colonization | MG991643 | MG991365 | MG991473 | <i>A. flavus</i>         | <i>A. flavus</i>    |
|                    | CMXY 23324 | 2017.08 | BALF | 23 | M | Liver disease        | Colonization | MG991646 | MG991368 | MG991476 | <i>A. flavus</i>         | <i>A. effusus</i>   |
|                    | CMXY 24985 | 2017.09 | BALF | 94 | M | DM                   | CPA          | MG991649 | MG991372 | MG991480 | Genus <i>Aspergillus</i> | <i>A. flavus</i>    |
|                    | CMXY 25420 | 2017.10 | BALF | 48 | F | -                    | Colonization | MG991651 | MG991374 | MG991482 | <i>A. flavus</i>         | <i>A. flavus</i>    |
|                    | CMXY 25987 | 2017.03 | BALF | 71 | M | CKD, Solid tumor, DM | Colonization | MG991654 | MG991378 | MG991486 | Genus <i>Aspergillus</i> | <i>A. flavus</i>    |
|                    | CMXY 26475 | 2017.02 | BALF | 68 | M | -                    | Colonization | MG991655 | MG991379 | MG991487 | Genus <i>Aspergillus</i> | <i>A. flavus</i>    |

|                    |            |         |      |    |   |                                  |              |          |          |          |                          |                       |
|--------------------|------------|---------|------|----|---|----------------------------------|--------------|----------|----------|----------|--------------------------|-----------------------|
|                    | CMXY 27481 | 2017.04 | BALF | 89 | M | Diabetes, Solid tumor,<br>Asthma | ABPA         | MG991658 | MG991382 | MG991490 | <i>A. flavus</i>         | <i>A. effusus</i>     |
|                    | CMXY 27600 | 2017.03 | BALF | 61 | F | Craniocerebral injury            | Colonization | MG991659 | MG991383 | MG991491 | <i>A. flavus</i>         | <i>A. flavus</i>      |
|                    | CMXY 28854 | 2017.08 | BALF | 56 | M | Cerebral infarction, Diabetes    | Colonization | MG991661 | MG991385 | MG991493 | Genus <i>Aspergillus</i> | <i>A. flavus</i>      |
|                    | CMXY 29346 | 2017.11 | BALF | 84 | M | ITP, IPF                         | Colonization | MG991664 | MG991388 | MG991496 | Genus <i>Aspergillus</i> | <i>A. flavus</i>      |
|                    | CMXY 30197 | 2018.01 | BALF | 38 | M | Cerebral hemorrhage              | Colonization | MG991671 | MG991395 | MG991503 | Genus <i>Aspergillus</i> | <i>A. flavus</i>      |
| <i>A. niger</i> C  | CMXY 1714  | 2016.03 | BALF | 52 | M | Solid tumor                      | Colonization | MG991572 | MG991335 | MG991443 | <i>A. niger</i>          | <i>A. tubingensis</i> |
| N=15               | CMXY 1963  | 2016.04 | BALF | 75 | M | -                                | Colonization | MG991574 | MG991342 | MG991450 | Genus <i>Aspergillus</i> | <i>A. niger</i>       |
|                    | CMXY 3556  | 2016.07 | BALF | 64 | F | -                                | Colonization | MG991583 | MG991401 | MG991509 | <i>A. niger</i>          | <i>A. awamori</i>     |
|                    | CMXY 5154  | 2016.12 | BALF | 66 | M | -                                | Colonization | MG991584 | MG991402 | MG991510 | <i>A. niger</i>          | <i>A. awamori</i>     |
|                    | CMXY 5474  | 2017.01 | BALF | 65 | F | -                                | Colonization | MG991588 | MG991406 | MG991514 | Genus <i>Aspergillus</i> | <i>A. tubingensis</i> |
|                    | CMXY 15849 | 2017.03 | BALF | 78 | M | COPD                             | Colonization | MG991619 | MG991331 | MG991439 | <i>A. niger</i>          | <i>A. niger</i>       |
|                    | CMXY 19015 | 2017.04 | BALF | 59 | M | -                                | Colonization | MG991625 | MG991340 | MG991448 | Genus <i>Aspergillus</i> | <i>A. tubingensis</i> |
|                    | CMXY 19775 | 2017.03 | BALF | 82 | F | -                                | Colonization | MG991627 | MG991343 | MG991451 | Genus <i>Aspergillus</i> | <i>A. tubingensis</i> |
|                    | CMXY 20958 | 2017.10 | BALF | 65 | M | Cerebral infarction              | Colonization | MG991630 | MG991349 | MG991457 | Genus <i>Aspergillus</i> | <i>A. niger</i>       |
|                    | CMXY 23633 | 2017.11 | BALF | 62 | M | Solid tumor                      | Colonization | MG991647 | MG991370 | MG991478 | <i>A. niger</i>          | <i>A. niger</i>       |
|                    | CMXY 23807 | 2017.02 | BALF | 65 | M | Solid tumor                      | Colonization | MG991648 | MG991371 | MG991479 | <i>A. niger</i>          | <i>A. awamori</i>     |
|                    | CMXY 25845 | 2017.08 | BALF | 68 | M | -                                | Colonization | MG991652 | MG991376 | MG991484 | Genus <i>Aspergillus</i> | <i>A. awamori</i>     |
|                    | CMXY 25850 | 2017.04 | BALF | 61 | F | SLE, Diabetes                    | Colonization | MG991653 | MG991377 | MG991485 | Genus <i>Aspergillus</i> | <i>A. tubingensis</i> |
|                    | CMXY 27207 | 2017.10 | BALF | 42 | M | -                                | Colonization | MG991657 | MG991381 | MG991489 | Genus <i>Aspergillus</i> | <i>A. tubingensis</i> |
|                    | CMXY 30575 | 2018.01 | BALF | 26 | M | PT                               | Colonization | MG991673 | MG991397 | MG991505 | Genus <i>Aspergillus</i> | <i>A. niger</i>       |
| <i>A. terreus</i>  | CMXY 937   | 2017.05 | BALF | 80 | F | COPD, asthma                     | CPA          | MG991569 | MG991418 | MG991525 | Genus <i>Aspergillus</i> | <i>A. terreus</i>     |
| <i>A. sydowii</i>  | CMXY 18899 | 2016.10 | BALF | 61 | F | -                                | Colonization | MG991624 | MG991339 | MG991447 | Genus <i>Aspergillus</i> | <i>A. sydowii</i>     |
| <i>A. nidulans</i> | CMXY 2059  | 2016.04 | BALF | 57 | M | Solid tumor                      | Colonization | MG991576 | MG991346 | MG991454 | Genus <i>Aspergillus</i> | <i>A. nidulans</i>    |

“-” means the patient had no underlying disease; Abbreviations: F, Female; M, Male; BALF, bronchoalveolar lavage fluid; DM, diabetes mellitus; SLE, systemic lupus erythematosus; MODS, multiple organ dysfunction syndrome; PT, Pulmonary tuberculosis; IPF, idiopathic pulmonary fibrosis; COPD, chronic obstructive

pulmonary disease; CKD, Chronic kidney disease; *A. fumigatus* C, *Aspergillus fumigatus* complex; *A. flavus* C, *Aspergillus flavus* complex; *A. niger* C, *Aspergillus niger* complex; *A. terreus*, *Aspergillus terreus*; *A. sydowii*, *Aspergillus sydowii*; *A. nidulans*, *Aspergillus nidulans*.

**Supplementary Table S2.** Primers and Polymerase Chain Reaction amplification conditions used for molecular identification of genotypes and species for the isolates analyzed in this study.

| Locus | Primers | Primer sequence                | Amplification conditions                                           |
|-------|---------|--------------------------------|--------------------------------------------------------------------|
| ITS   | ITS1    | 5'-TCCGTAGGTGAACCTGCGG-3'      | 94°C 5min; 30 cycles: 94°C 60s, 55°C 60s, 72°C 60s; 72°C 10 min    |
|       | ITS4    | 5'- TCCTCCGCTTATTGATATGC-3'    |                                                                    |
| BenA  | BT2a    | 5'-GGTAACCAAATCGGTGCTGCTTTC-3' | 95°C 7 min; 35 cycles: 95°C 30s, 61°C 30s, 72°C 1 min; 72°C 10 min |
|       | BT2b    | 5'-ACCCTCAGTGTAGTGACCCTTGGC-3' |                                                                    |
| CaM   | Cmd5    | 5'-CCGAGTACAAGGAGGCCTTC-3'     | 95°C 7 min; 35 cycles: 95°C 30s, 57°C 30s, 72°C 1 min; 72°C 10 min |
|       | Cmd6    | 5'-CCGATAGAGGTCATAACGTGG-3'    |                                                                    |

Abbreviation: ITS, internal transcribed spacer; BenA, partial  $\beta$ -tubulin; CaM, calmodulin.

**Supplementary Table S3.** Epidemiological cutoff values for susceptibility for antifungal drugs triazoles, caspofungin and amphotericin B against five *Aspergillus* species.

| Species             | ECVs (mg/L)     |                 |                    |                    |                    |                 |
|---------------------|-----------------|-----------------|--------------------|--------------------|--------------------|-----------------|
|                     | ITZ             | VRZ             | PSZ                | ISZ                | CFG                | AmB             |
| <i>A. fumigatus</i> | 1 <sup>37</sup> | 1 <sup>37</sup> | 0.25 <sup>37</sup> | 1 <sup>36</sup>    | 1 <sup>35</sup>    | 2 <sup>38</sup> |
| <i>A. flavus</i>    | 1 <sup>37</sup> | 1 <sup>37</sup> | 0.25 <sup>37</sup> | 1 <sup>36</sup>    | 0.5 <sup>35</sup>  | 4 <sup>38</sup> |
| <i>A. niger</i>     | 2 <sup>37</sup> | 2 <sup>37</sup> | 0.5 <sup>37</sup>  | 4 <sup>36</sup>    | 0.25 <sup>35</sup> | 2 <sup>38</sup> |
| <i>A. terreus</i>   | 1 <sup>37</sup> | 1 <sup>37</sup> | 0.5 <sup>37</sup>  | 1 <sup>36</sup>    | 0.5 <sup>35</sup>  | 4 <sup>38</sup> |
| <i>A. nidulans</i>  | 1 <sup>37</sup> | 2 <sup>37</sup> | 1 <sup>37</sup>    | 0.25 <sup>36</sup> | 0.5 <sup>35</sup>  | 4 <sup>38</sup> |

Abbreviations: ITZ, itraconazole; VRZ, voriconazole; PSZ, posaconazole; ISZ, isavuconazole; CFG, caspofungin; AmB, amphotericin B; ECVs, epidemiological cutoff values. MIC values greater than these values are considered resistant to the respective antifungal drug.
